# Supplementary material for: Quantitative kinetics of proteolytic enzymes determined by a surface concentration-based assay using peptide arrays
Source: Royal Society of Chemistry journal article supplement (doi:10.1039/c2an35080g), 2012-01-01

**Supplementary Fig. 1. Binding curves for substrate peptides binding to GMBS-modified array surfaces.** The indicated concentrations of substrate peptides (P1-4) were applied to GMBS-modified surfaces of well-type arrays. Binding curves for the P1 (A), P2 (B), P3 (C), and P4 (D) peptides were obtained by fitting data using the non-linear regression program of the GraphPad PRISM.

**A**

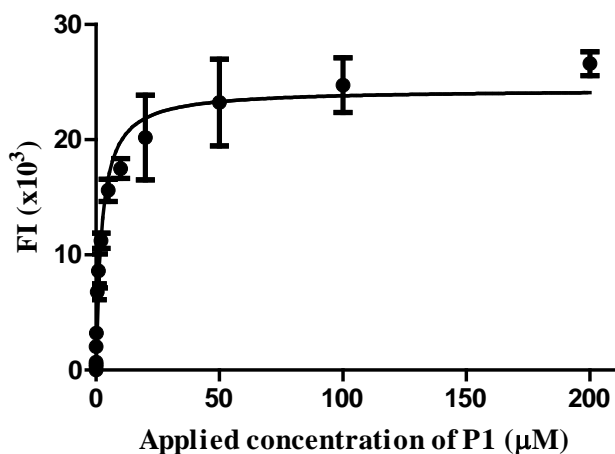

**B**

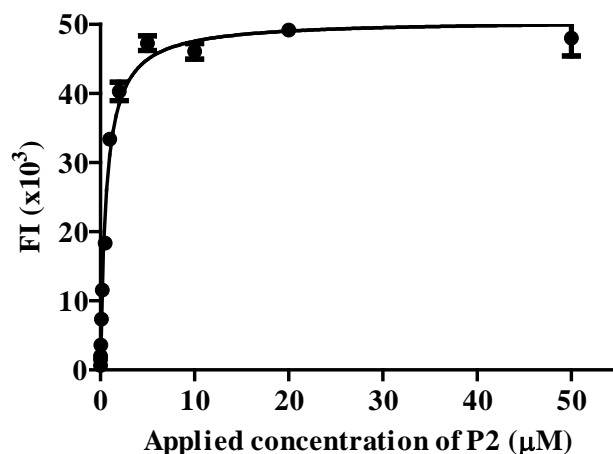

**C**

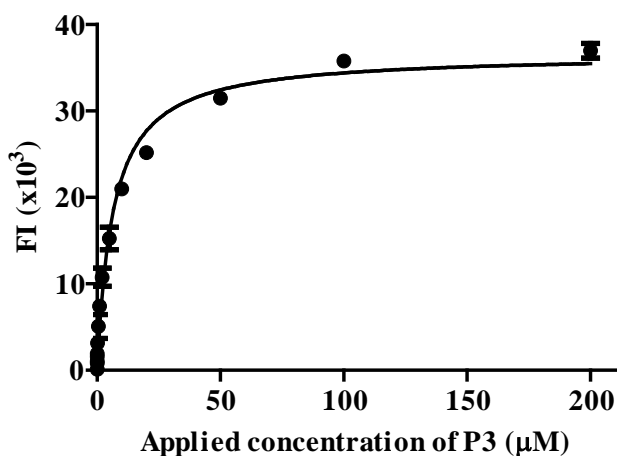

**D**

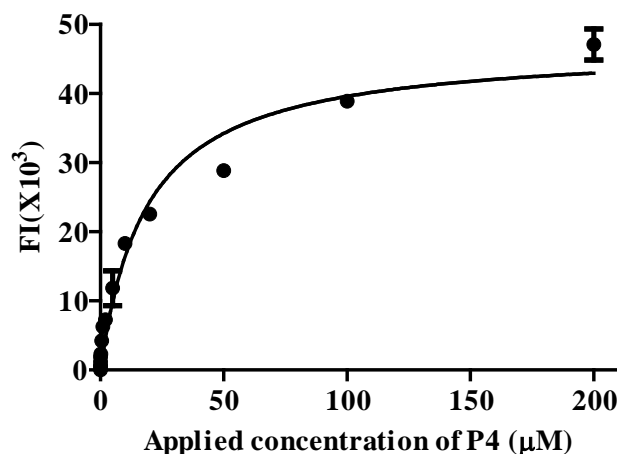

Supplement: c2an35080g.pdf [file c2an35080g.pdf]
